# Supplementary material for: Tea Seed Kaempferol Triglycoside Attenuates LPS-Induced Systemic Inflammation and Ameliorates Cognitive Impairments in a Mouse Model
Source: MDPI journal article supplement (doi:10.3390/molecules27072055), 2022-03-22
Supplement: s1 [file s1]

## SUPPLEMENTARY MATERIAL

# Tea Seed Kaempferol Triglycoside Attenuates LPS-Induced Systemic Inflammation and Ameliorates Cognitive Impairments in a Mouse Model

Tsung-Ming Yeh <sup>1,2,3</sup>, Ching-Dong Chang <sup>1</sup>, Shyh-Shyan Liu <sup>1</sup>, Chi-I Chang <sup>2,\*</sup>  
and Wen-Ling Shih <sup>2,\*</sup>

<sup>1</sup> Department of Veterinary Medicine, National Pingtung University of Science and Technology, Pingtung 912, Taiwan; ytm@mail.npust.edu.tw (T.-M.Y.); cdchang@mail.npust.edu.tw (C.-D.C.); lad@mail.npust.edu.tw (S.-S.L.)

<sup>2</sup> Department of Biological Science and Technology, National Pingtung University of Science and Technology, Pingtung 912, Taiwan

<sup>3</sup> General Research Service Center, National Pingtung University of Science and Technology, Pingtung 912, Taiwan

\* Correspondence: changchii@mail.npust.edu.tw (C.-I.C.); wlshih@mail.npust.edu.tw (W.-L.S.); Tel.: +886-8-7703202 (ext. 5185) (C.-I.C.); +886-8-7703202 (ext. 5192) (W.-L.S.)

## CONTENT

**Figure S1.** <sup>1</sup>H-NMR spectrum of KXRG in CD<sub>3</sub>OD.

**Figure S2.** <sup>13</sup>C-NMR spectrum and DEPT of KXRG in CD<sub>3</sub>OD.

**Figure S3.** IR spectrum of KXRG.

**Figure S4.** Mass spectrum of KXRG.

**Figure S5.** HPLC chromatogram of KXRG.

**Table S1.** The purity calculation of KXRG.

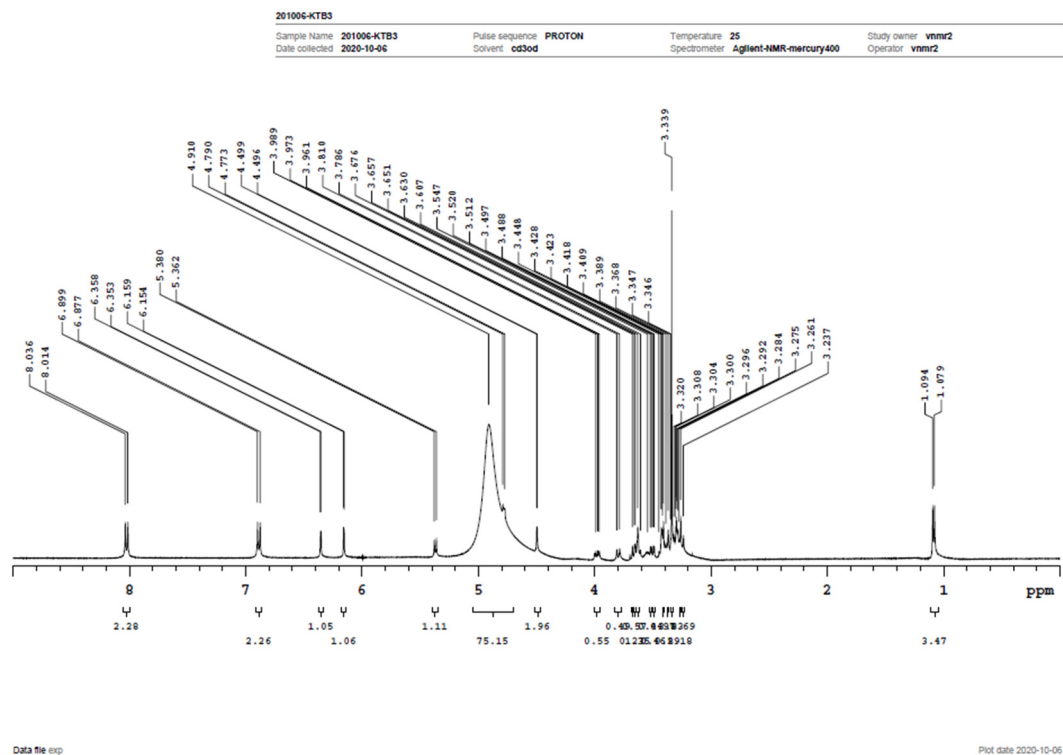

**Figure S1.**  $^1\text{H}$ -NMR spectrum of KXRG in  $\text{CD}_3\text{OD}$ .

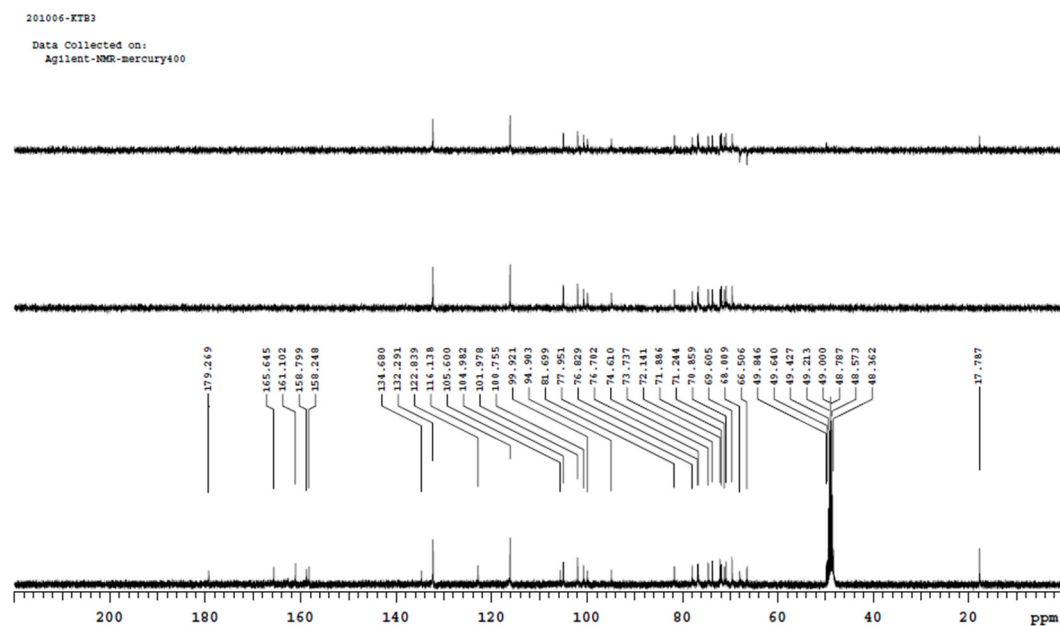

**Figure S2.**  $^{13}\text{C}$ -NMR spectrum and DEPT of KXRG in  $\text{CD}_3\text{OD}$ .

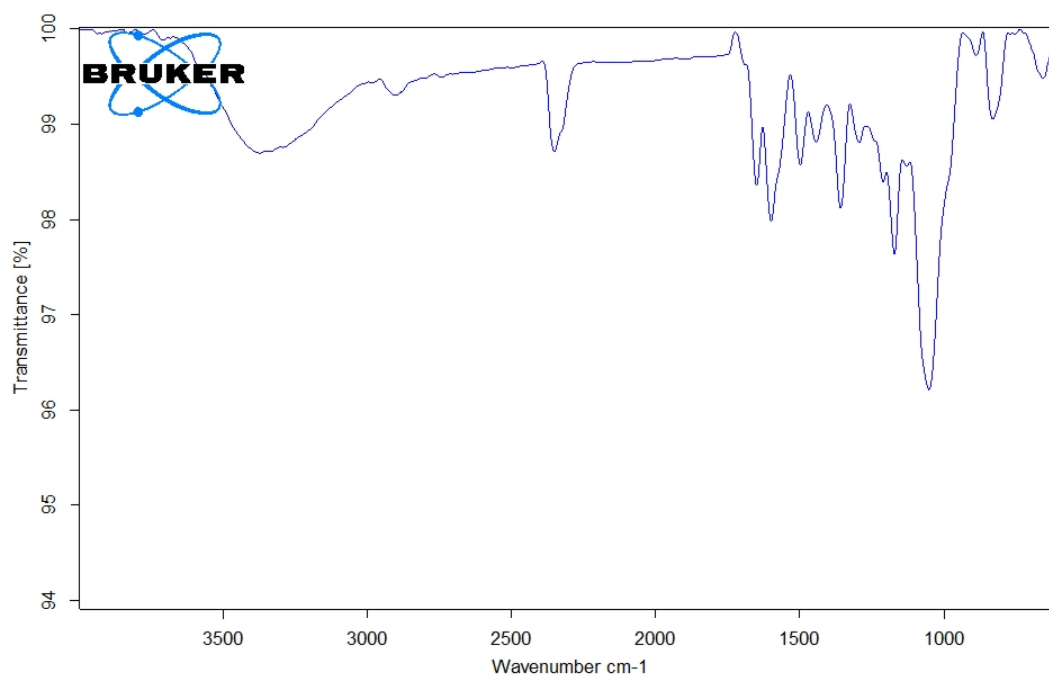

**Figure S3.** IR spectrum of KXRG.

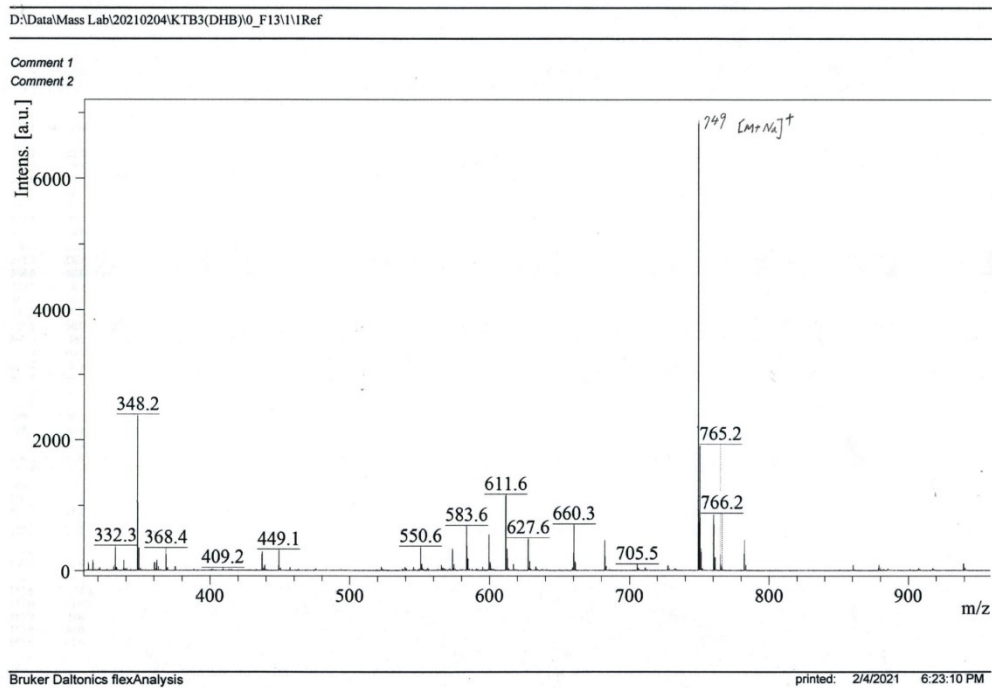

**Figure S4.** Mass spectrum of KXRG.

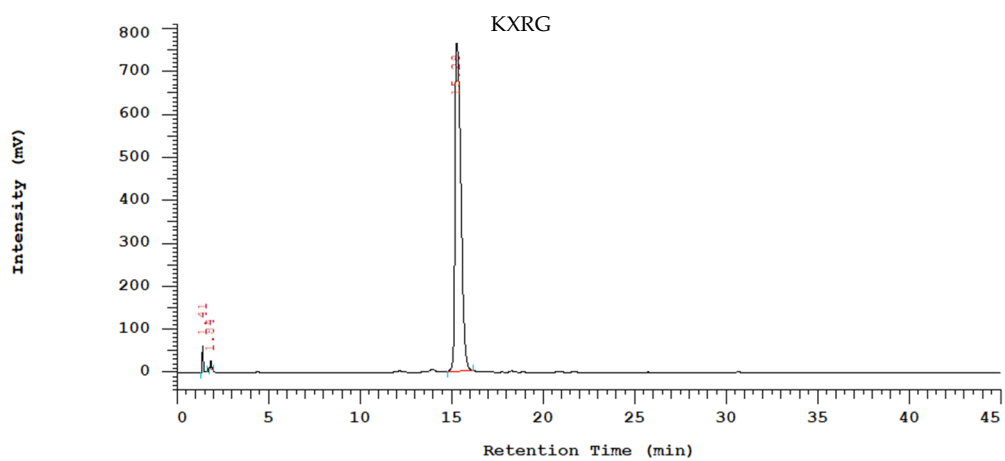

**Figure S5.** HPLC chromatogram of KXRG (detection wavelength, 280 nm).

**Table S1.** The purity calculation of KXRG.

| Peak No. | Retention time | Area     | Percentage (%)   |
|----------|----------------|----------|------------------|
| 1        | 1.41           | 0        | 0 (solvent peak) |
| 2        | 1.84           | 110623   | 0.647            |
| 3        | 15.28          | 16999015 | 99.353           |
| Total    |                | 17109638 | 100              |
